# Supplementary material for: The origins of cannabis smoking: Chemical residue evidence from the first millennium BCE in the Pamirs
Source: PubMed Central journal article supplement — Sci Adv. 2019 Jun 12;5(6):eaaw1391. doi: 10.1126/sciadv.aaw1391 (PMC6561734; doi:10.1126/sciadv.aaw1391), 2019-06-12
Supplement: aaw1391_SM.pdf [file aaw1391_SM.pdf]

## Supplementary Materials for

### **The origins of cannabis smoking: Chemical residue evidence from the first millennium BCE in the Pamirs**

Meng Ren, Zihua Tang, Xinhua Wu, Robert Spengler, Hongen Jiang, Yimin Yang\*, Nicole Boivin

\*Corresponding author. Email: yiminyang@ucas.ac.cn

Published 12 June 2019, *Sci. Adv.* **5**, eaaw1391 (2019)

DOI: 10.1126/sciadv.aaw1391

#### **This PDF file includes:**

Table S1. Radiocarbon dates from the Jirzankal Cemetery.

Fig. S1. Ancient cannabis plant from tomb M231 (ca. 790–520 BCE) at the Jiayi Cemetery in Turpan, Xinjiang.

Fig. S2. Chromatograms of the wooden brazier M9:1 from the Jirzankal Cemetery.

Fig. S3. Chromatograms of the wooden brazier M9:2 from the Jirzankal Cemetery.

Fig. S4. Chromatograms of the wooden brazier M11:14 from the Jirzankal Cemetery.

Fig. S5. Chromatograms of the wooden brazier M12:4 from the Jirzankal Cemetery.

Fig. S6. Chromatograms of the wooden brazier M14:23 from the Jirzankal Cemetery.

Fig. S7. Chromatograms of the wooden brazier M15:3 from the Jirzankal Cemetery.

Fig. S8. Chromatograms of the wooden brazier M23:14 from the Jirzankal Cemetery.

Fig. S9. Chromatograms of the wooden brazier M25:2 from the Jirzankal Cemetery.

Fig. S10. Chromatograms of the wooden brazier M25:17 from the Jirzankal Cemetery.

Fig. S11. Chromatograms of the wooden brazier M49:2 from the Jirzankal Cemetery.

Fig. S12. Chromatograms of the burnt stone in the wooden brazier M11:14 from the Jirzankal Cemetery.

Fig. S13. Chromatograms of the burnt stone in the wooden brazier M14:23 from the Jirzankal Cemetery.

Fig. S14. Chromatograms of the burnt stone in the wooden brazier M23:14 from the Jirzankal Cemetery.

Fig. S15. Chromatograms of the burnt stone in the wooden brazier M25:2 from the Jirzankal Cemetery.

**Table S1. Radiocarbon dates from the Jirzankal Cemetery.**

| Tomb | Material   | Lab No.     | $\delta^{13}\text{C}$ (‰) | AMS age (BP)  | Calibrated age (cal. BP, $\pm 2\sigma$ ) |
|------|------------|-------------|---------------------------|---------------|------------------------------------------|
| M1   | Textile    | Beta-354583 | -19.6                     | 2560 $\pm$ 30 | 2750-2550 <sup>i</sup>                   |
| M1   | Wood       | Beta-354584 | -23.7                     | 2510 $\pm$ 30 | 2740-2470 <sup>i</sup>                   |
| M10  | Human bone | Beta-360538 | -17.9                     | 2450 $\pm$ 30 | 2710-2360 <sup>i</sup>                   |
| M11  | Human bone | Beta-360540 | -17.6                     | 2390 $\pm$ 30 | 2650-2360 <sup>i</sup>                   |
| M12  | Human bone | Beta-360543 | -17.4                     | 2390 $\pm$ 30 | 2650-2350 <sup>i</sup>                   |
| M14  | Wood       | Beta-360547 | -23.3                     | 2370 $\pm$ 30 | 2460-2340 <sup>i</sup>                   |
| M14  | Wood       | Beta-403048 | -                         | 2450 $\pm$ 30 | 2710-2360 <sup>i</sup>                   |
| M14  | Wood       | Beta-400296 | -21.7                     | 2570 $\pm$ 30 | 2750-2700 <sup>ii</sup>                  |
| M15  | Wood       | Beta-400297 | -22.3                     | 2430 $\pm$ 30 | 2540-2355 <sup>ii</sup>                  |
| M25  | Human bone | Beta-403044 | -17.3                     | 2440 $\pm$ 30 | 2705-2355 <sup>i</sup>                   |
| M35  | Wood       | Beta-403051 | -24.1                     | 2410 $\pm$ 30 | 2685-2350 <sup>i</sup>                   |
| M49* | Wood       | Beta-403053 | -23.3                     | 2490 $\pm$ 30 | 2730-2460 <sup>i</sup>                   |

<sup>i</sup> Cited from ref. 44; <sup>ii</sup> cited from ref. 42; \* the original tomb No. was M50.

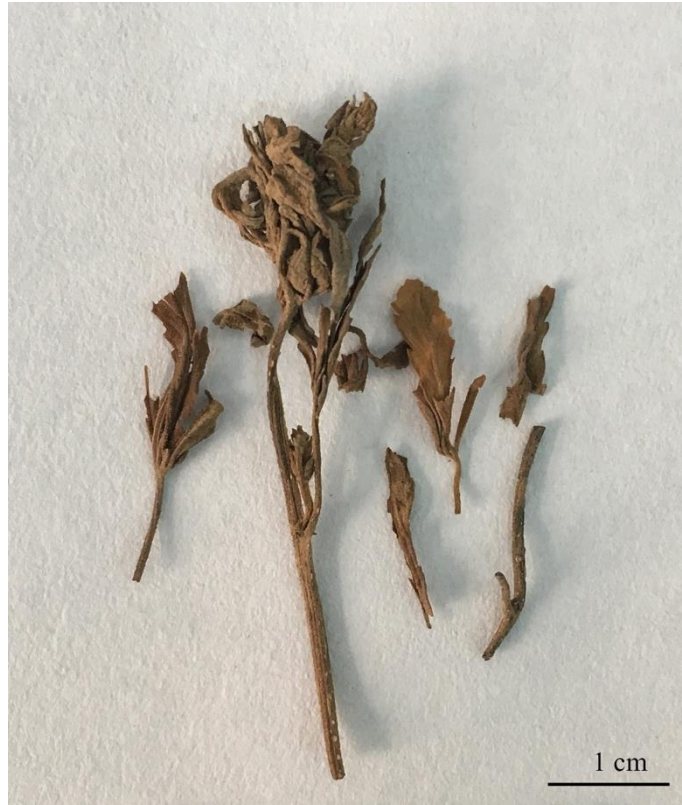

**Fig. S1. Ancient cannabis plant from tomb M231 (ca. 790–520 BCE) at the Jiayi Cemetery in Turpan, Xinjiang.** (Photo Credit: Meng Ren, University of Chinese Academy of Sciences)

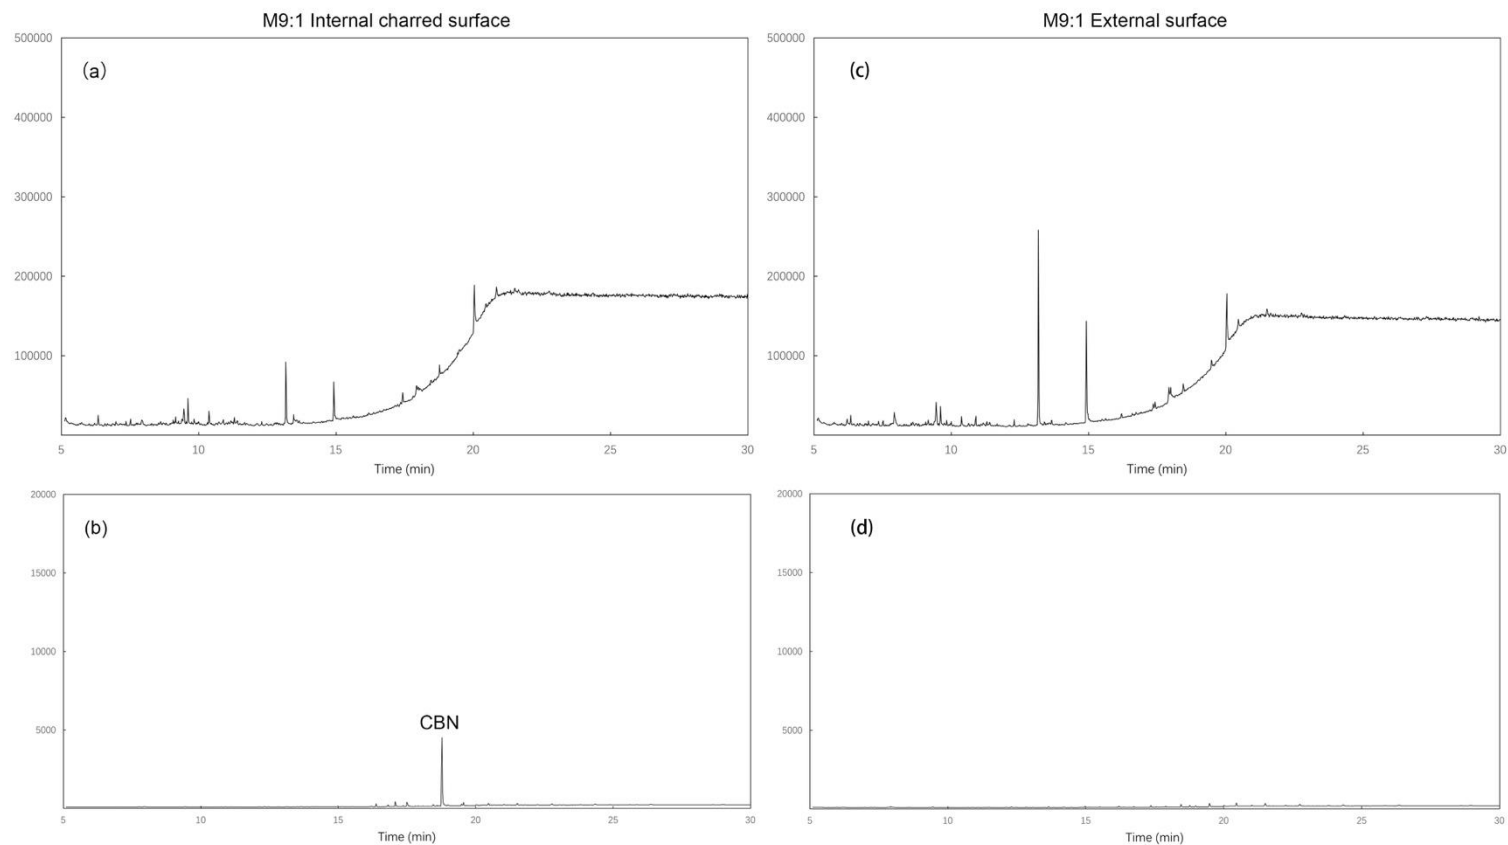

**Fig. S2. Chromatograms of the wooden brazier M9:1 from the Jirzankal Cemetery.** (a) Total ion current (TIC) chromatogram of the internal charred fragment of the wooden brazier M9:1 (labeled as 1I); (b) Chromatogram in select ion mode (SIM) of the internal charred fragment of the wooden brazier M9:1, showing cannabiniol (CBN); (c) TIC chromatogram of the external fragment of the wooden brazier M9:1 (labeled as 1E); (d) SIM chromatogram of the external fragment of the wooden brazier M9:1.

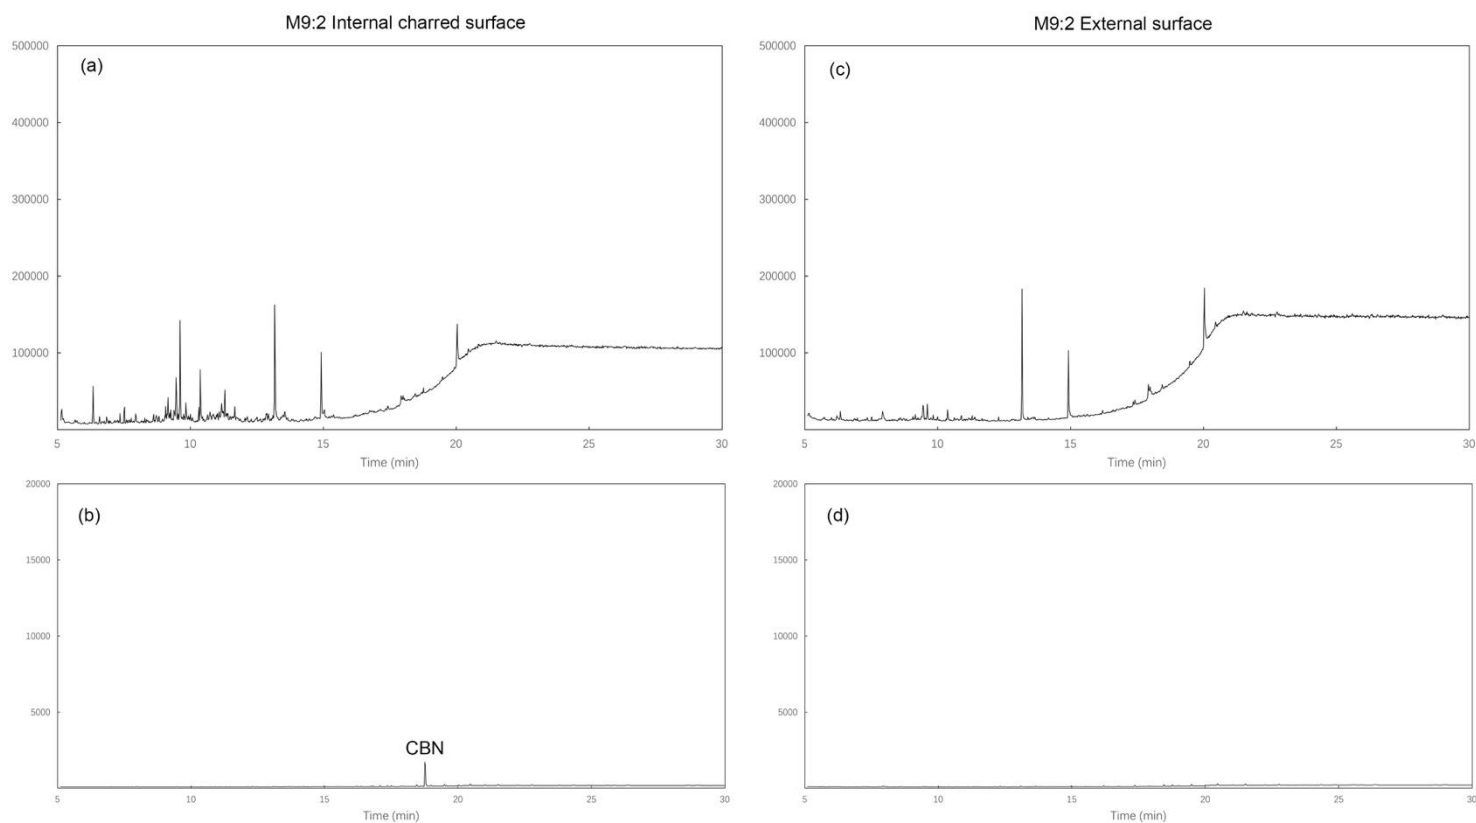

**Fig. S3. Chromatograms of the wooden brazier M9:2 from the Jirzankal Cemetery.** (a) TIC chromatogram of the internal charred fragment of the wooden brazier M9:2 (labeled as 2I); (b) SIM chromatogram of the internal charred fragment of the wooden brazier M9:2, showing cannabiniol (CBN); (c) TIC chromatogram of the external fragment of the wooden brazier M9:2 (labeled as 2E); (d) SIM chromatogram of the external fragment of the wooden brazier M9:2.

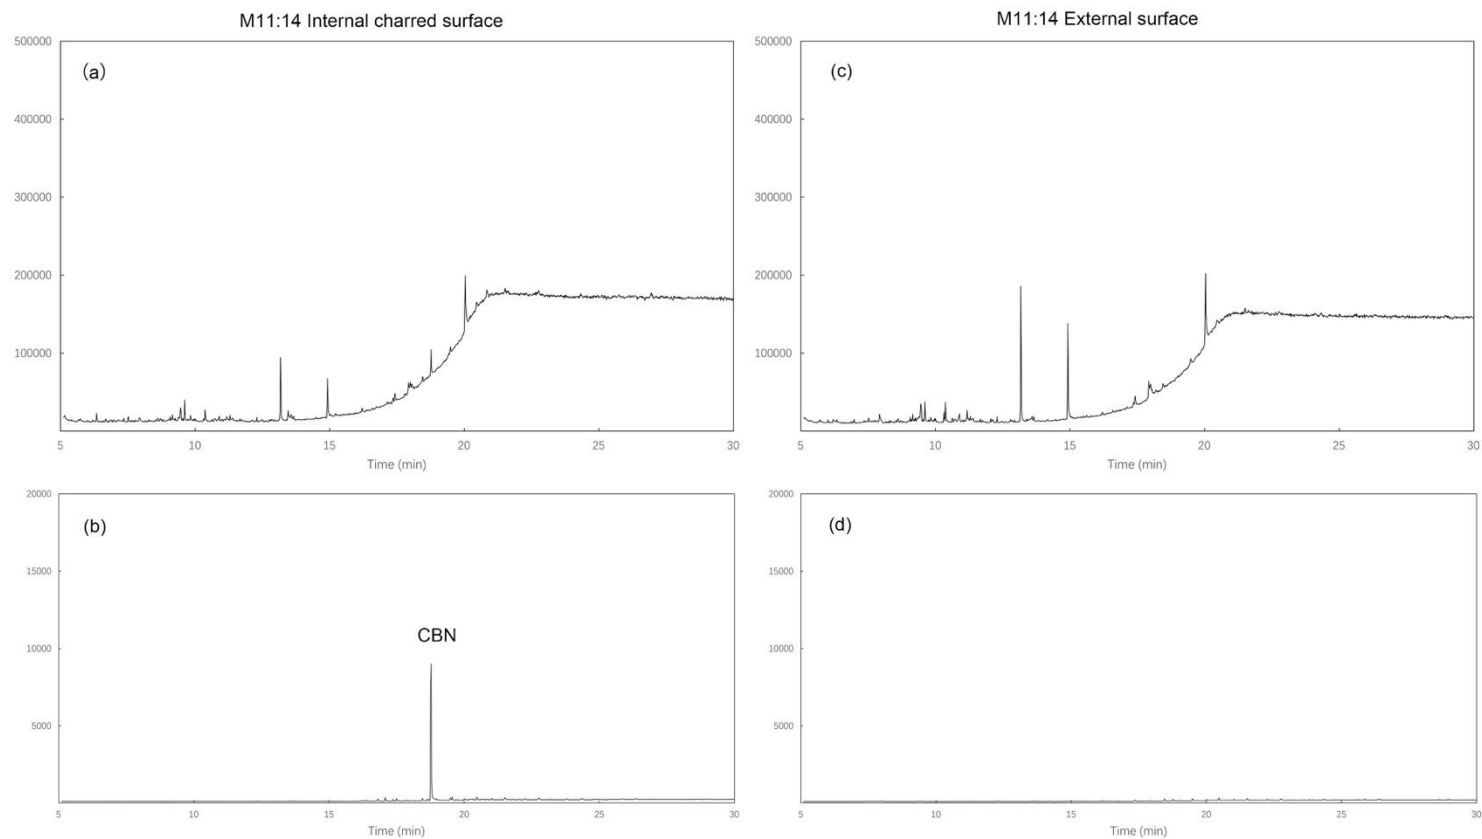

**Fig. S4. Chromatograms of the wooden brazier M11:14 from the Jirzankal Cemetery.** (a) TIC chromatogram of the internal charred fragment of the wooden brazier M11:14 (labeled as 3I); (b) SIM chromatogram of the internal charred fragment of the wooden brazier M11:14, showing cannabinoil (CBN); (c) TIC chromatogram of the external fragment of the wooden brazier M11:14 (labeled as 3E); (d) SIM chromatogram of the external fragment of the wooden brazier M11:14.

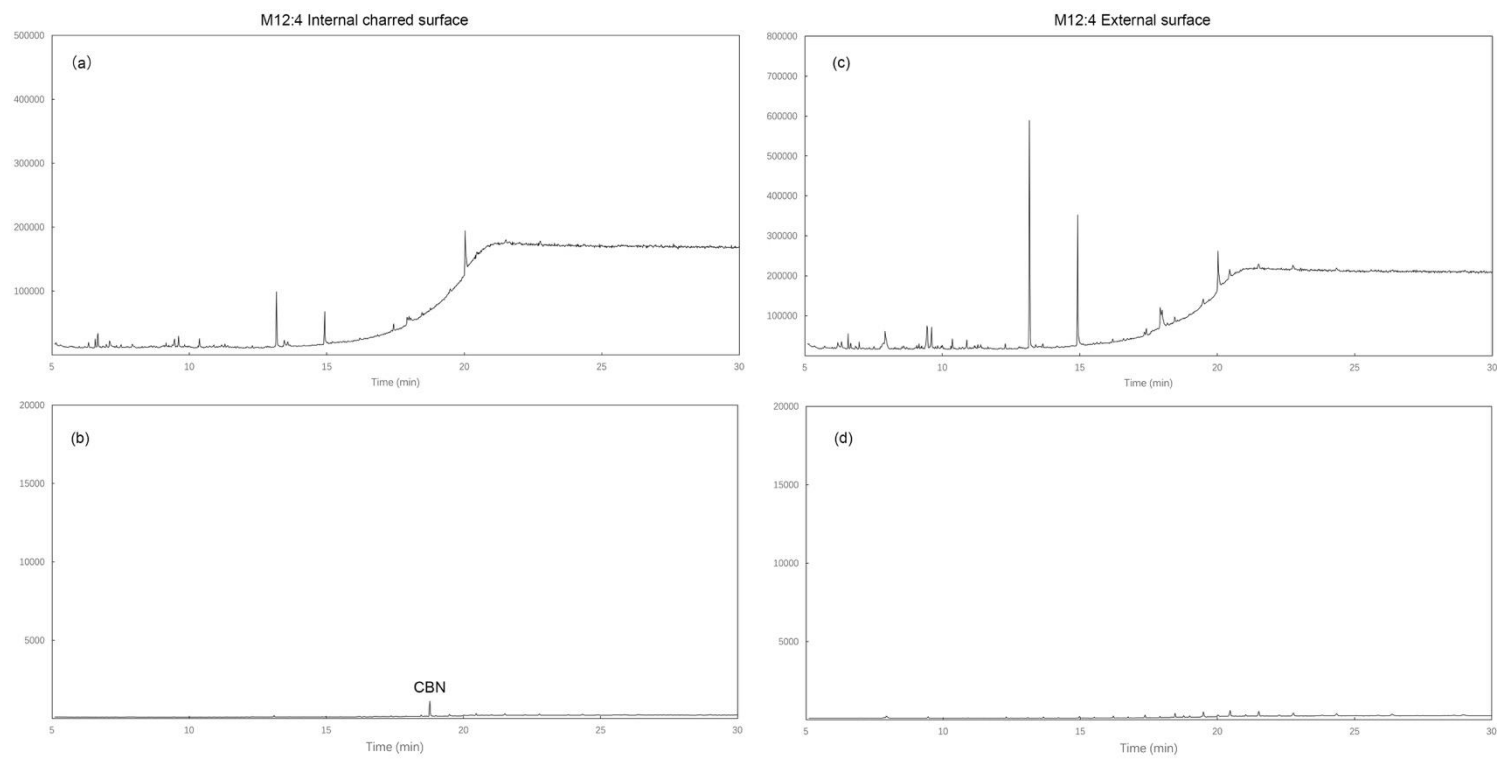

**Fig. S5. Chromatograms of the wooden brazier M12:4 from the Jirzankal Cemetery.** (a) TIC chromatogram of the internal charred fragment of the wooden brazier M12:4 (labeled as 4I); (b) SIM chromatogram of the internal charred fragment of the wooden brazier M12:4, showing cannabidiol (CBN); (c) TIC chromatogram of the external fragment of the wooden brazier M12:4 (labeled as 4E); (d) SIM chromatogram of the external fragment of the wooden brazier M12:4.

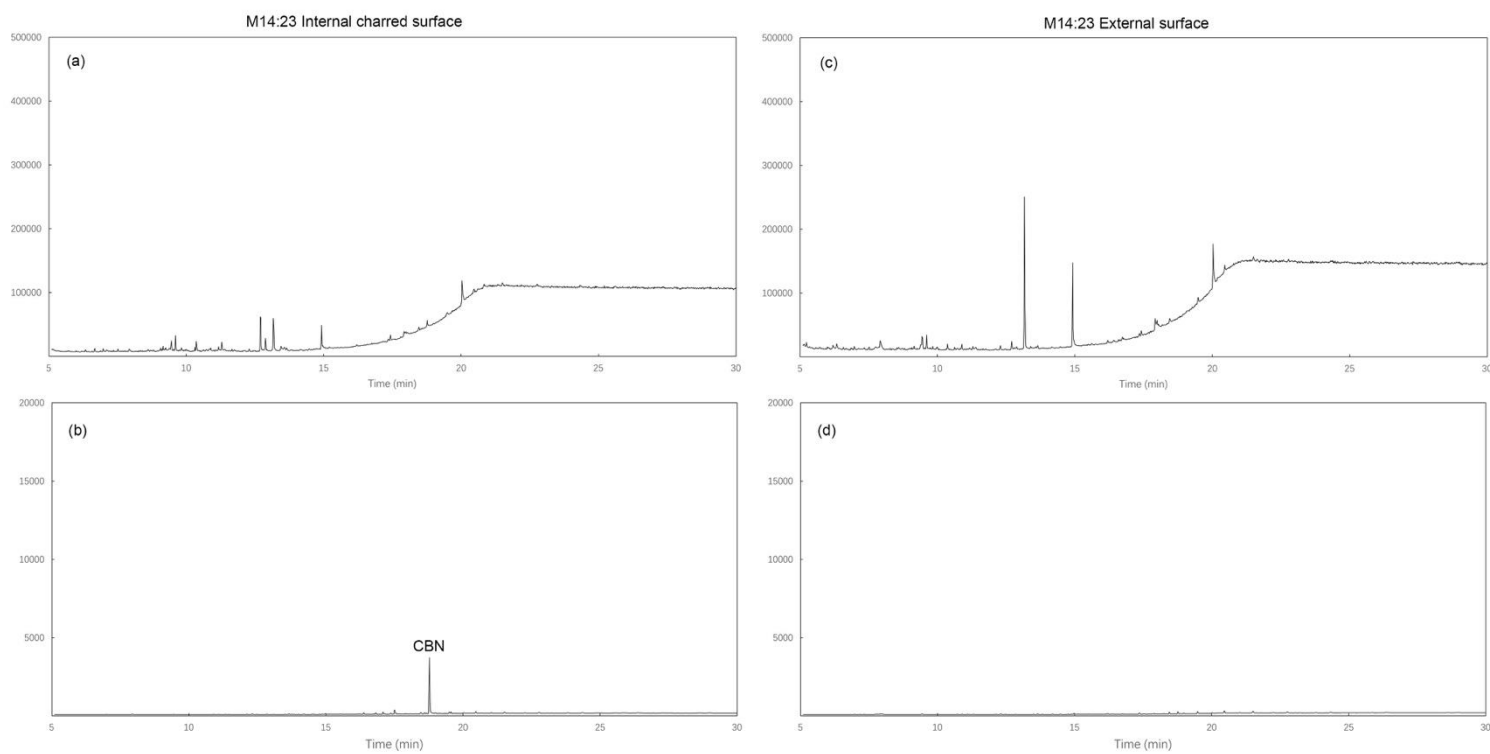

**Fig. S6. Chromatograms of the wooden brazier M14:23 from the Jirzankal Cemetery.** (a) TIC chromatogram of the internal charred fragment of the wooden brazier M14:23 (labeled as 5I); (b) SIM chromatogram of the internal charred fragment of the wooden brazier M14:23, showing cannabinoil (CBN); (c) TIC chromatogram of the external fragment of wooden brazier M14:23 (labeled as 5E); (d) SIM chromatogram of the external fragment of the wooden brazier M14:23.



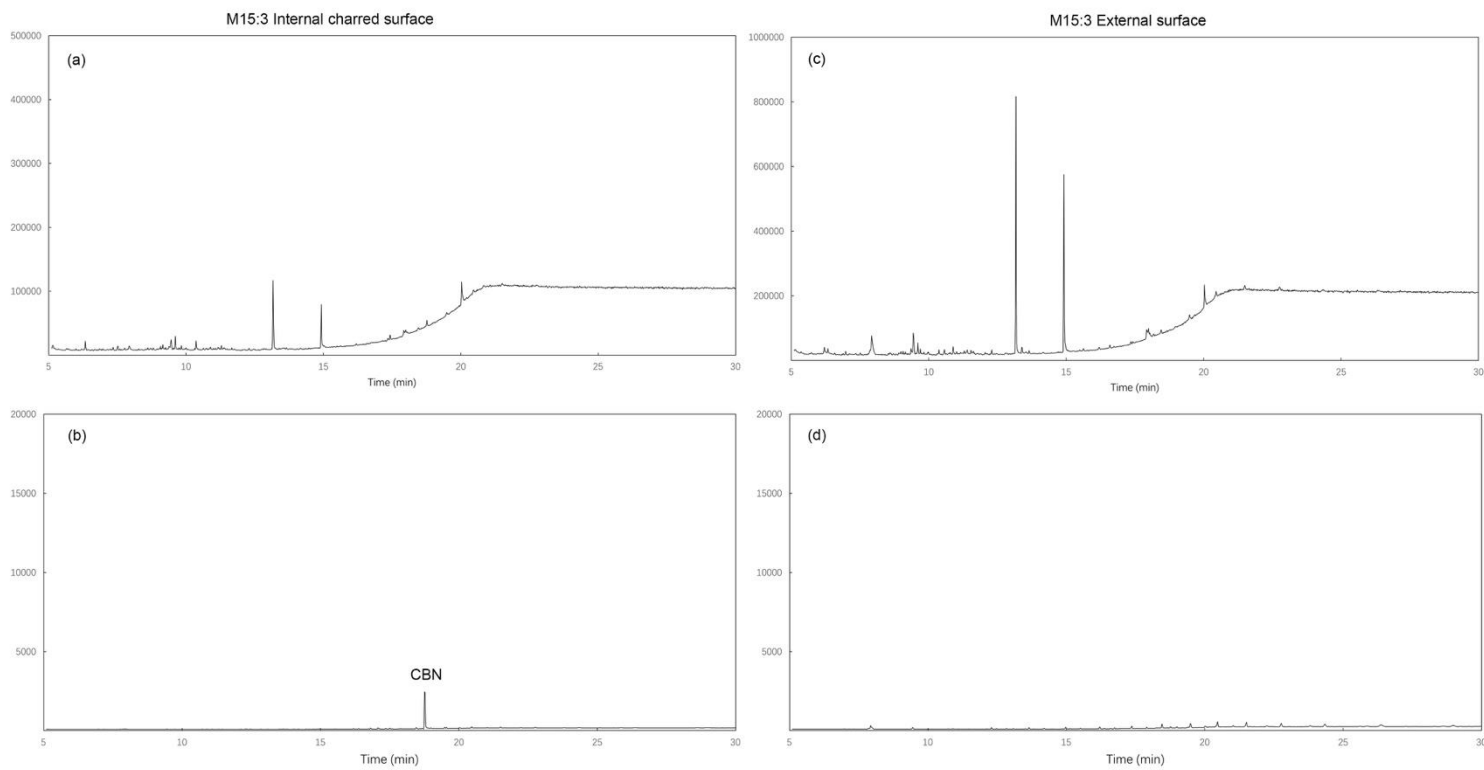

**Fig. S7. Chromatograms of the wooden brazier M15:3 from the Jirzankal Cemetery.** (a) TIC chromatogram of the internal charred fragment of the wooden brazier M15:3 (labeled as 6I); (b) SIM chromatogram of the internal charred fragment of the wooden brazier M15:3, showing cannabiniol (CBN); (c) TIC chromatogram of the external fragment of the wooden brazier M15:3 (labeled as 6E); (d) SIM chromatogram of the external fragment of the wooden brazier M15:3.

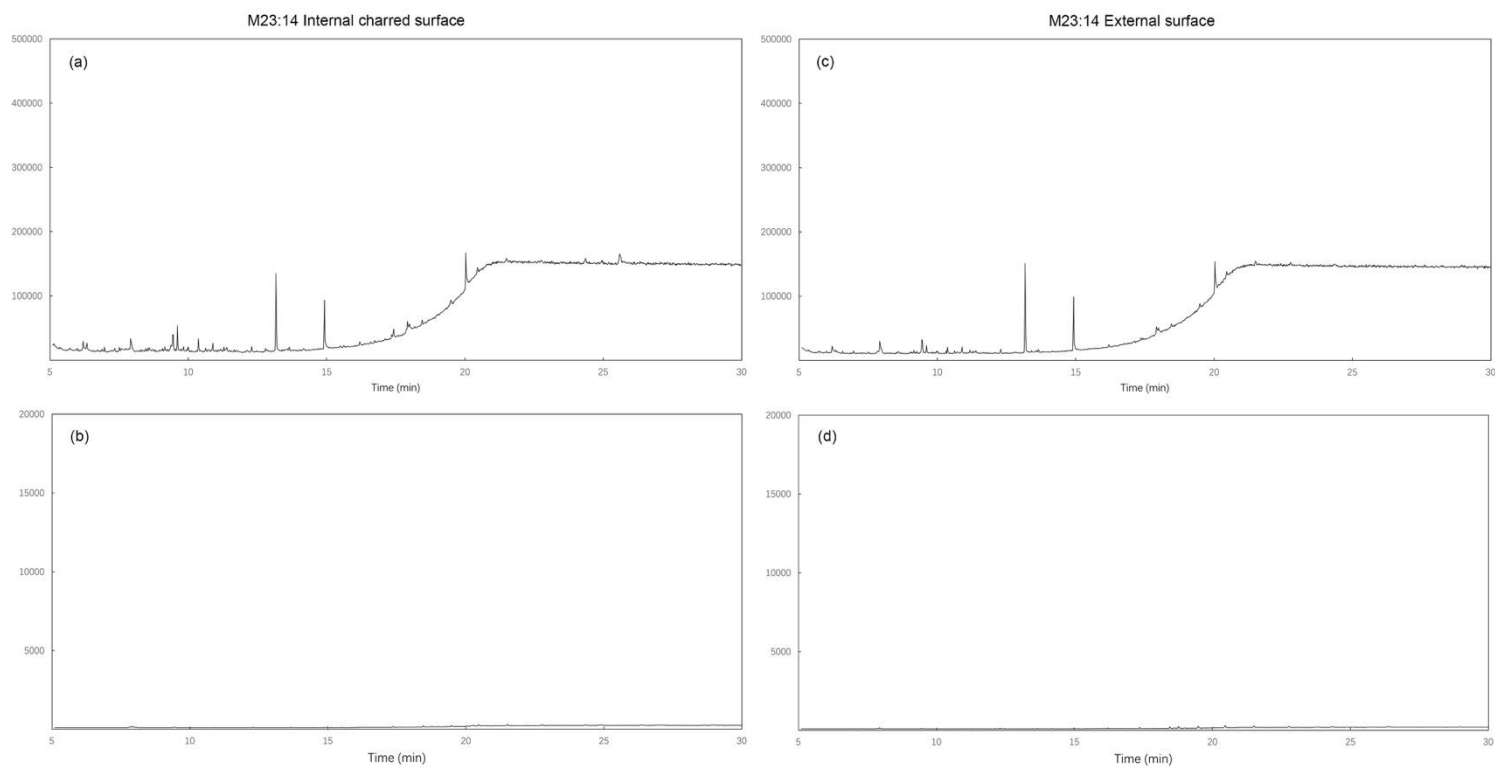

**Fig. S8. Chromatograms of the wooden brazier M23:14 from the Jirzankal Cemetery.** (a) TIC chromatogram of the internal charred fragment of the wooden brazier M23:14 (labeled as 7I); (b) SIM chromatogram of the internal charred fragment of the wooden brazier M23:14, without the detection of cannabinol (CBN); (c) TIC chromatogram of the external fragment of the wooden brazier M23:14 (labeled as 7E); (d) SIM chromatogram of the external fragment of the wooden brazier M23:14.

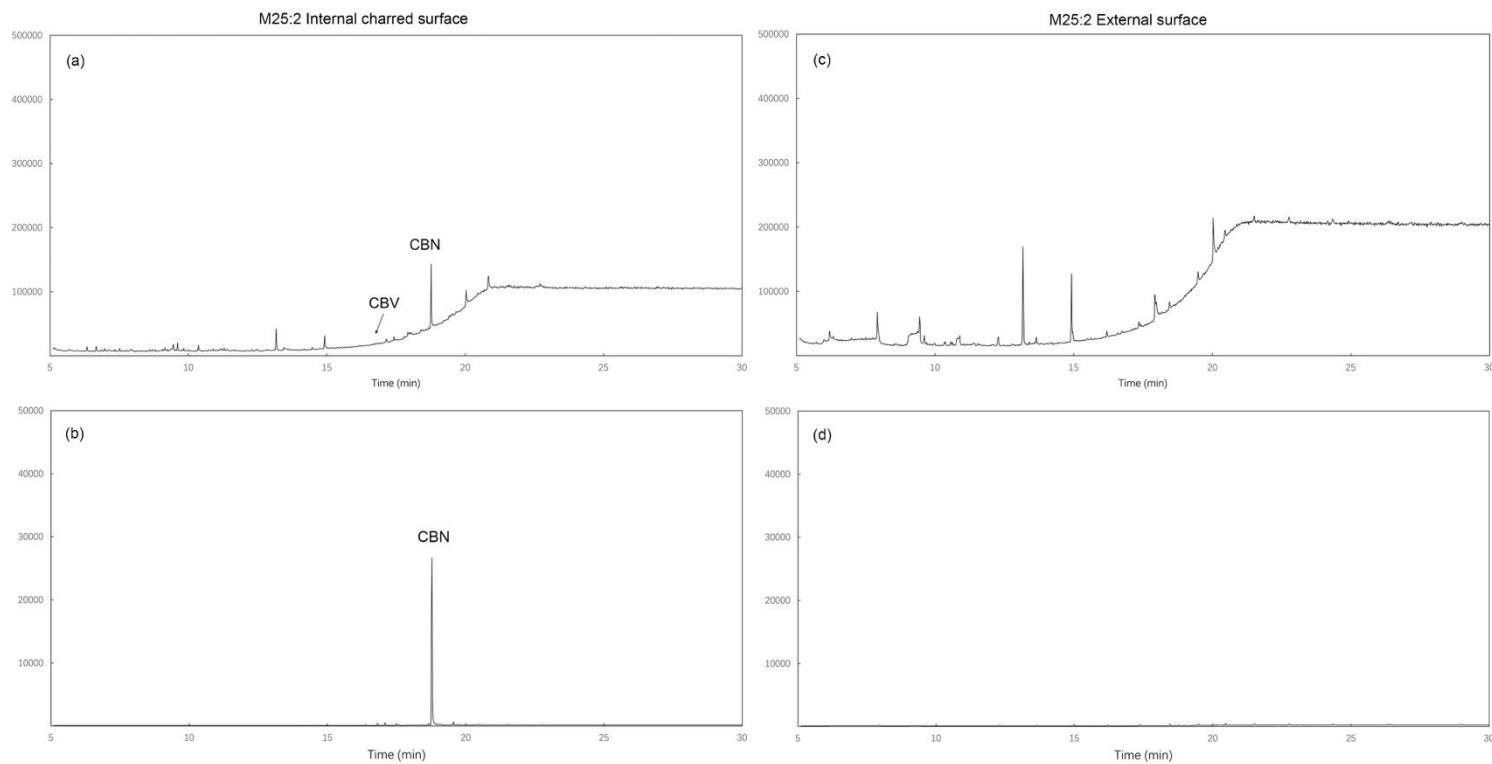

**Fig. S9. Chromatograms of the wooden brazier M25:2 from the Jirzankal Cemetery.** (a) TIC chromatogram of the internal charred fragment of the wooden brazier M25:2 (labeled as 8I); (b) SIM chromatogram of the internal charred fragment of the wooden brazier M25:2, showing cannabiniol (CBN); (c) TIC chromatogram of the external fragment of the wooden brazier M25:2 (labeled as 8E); (d) SIM chromatogram of the external fragment of the wooden brazier M25:2.

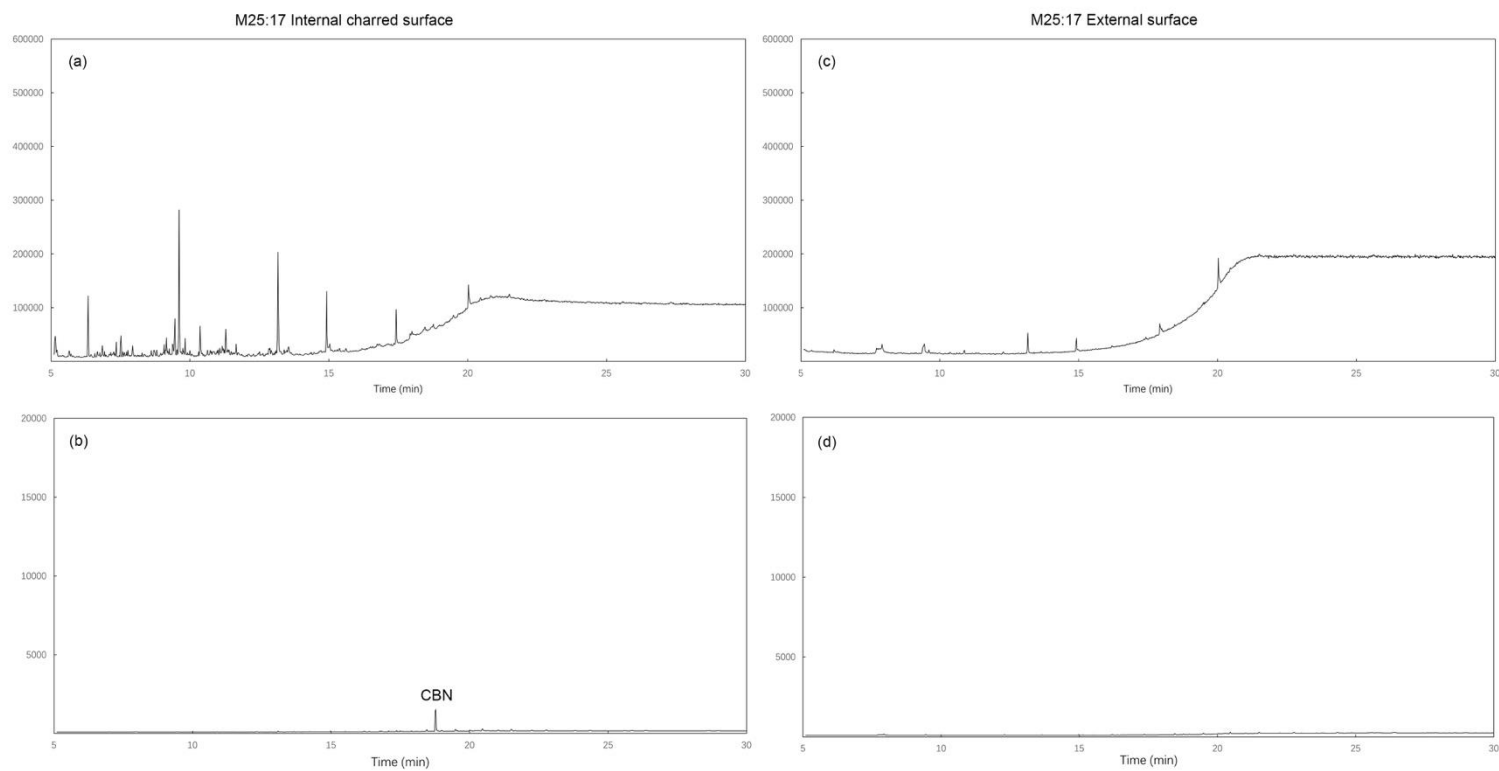

**Fig. S10. Chromatograms of the wooden brazier M25:17 from the Jirzankal Cemetery.** (a) TIC chromatogram of the internal charred fragment of the wooden brazier M25:17 (labeled as 9I); (b) SIM chromatogram of the internal charred fragment of the wooden brazier M25:17, showing cannabinoil (CBN); (c) TIC chromatogram of the external fragment of the wooden brazier M25:17 (labeled as 9E); (d) SIM chromatogram of the external fragment of the wooden brazier M25:17.

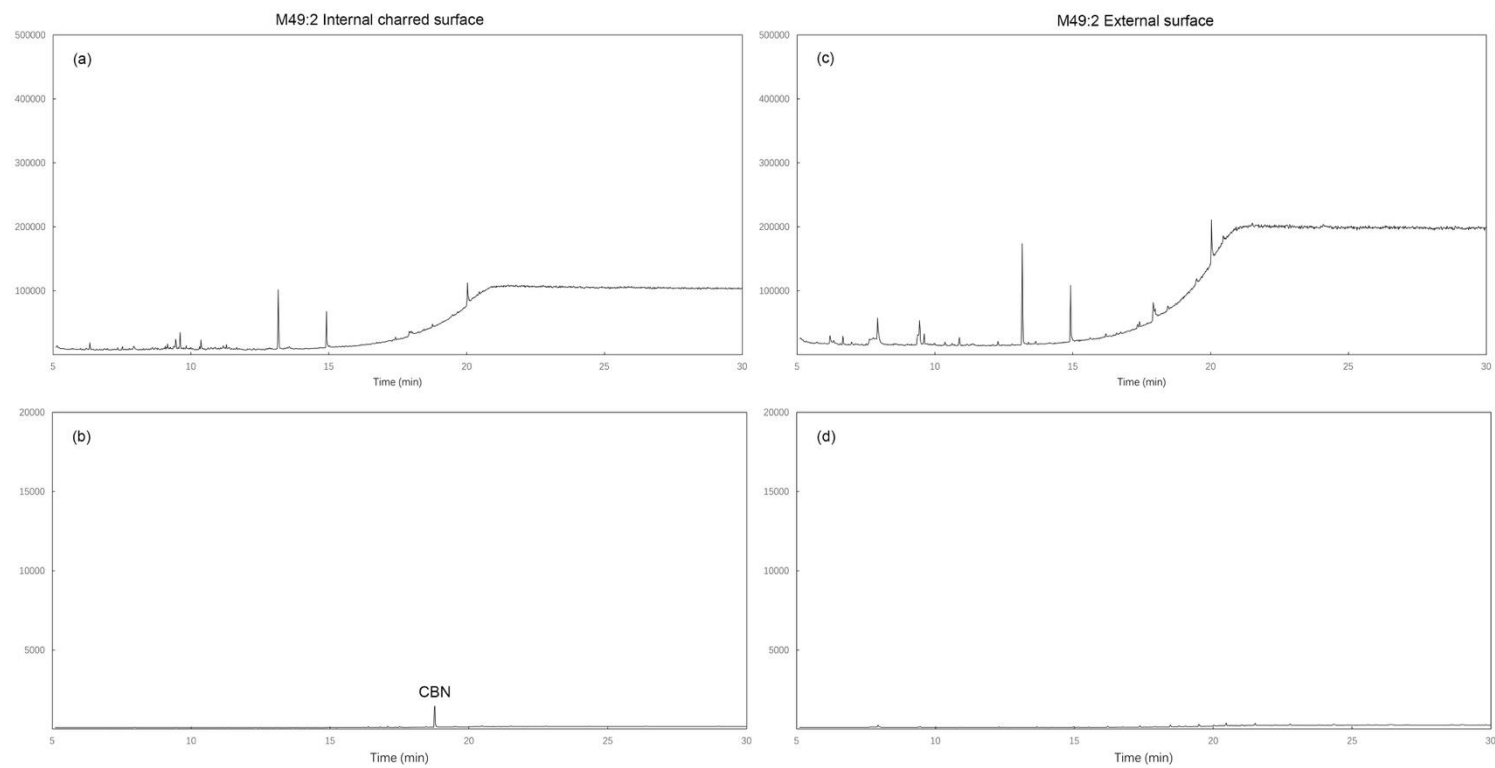

**Fig. S11. Chromatograms of the wooden brazier M49:2 from the Jirzankal Cemetery.** (a) TIC chromatogram of the internal charred fragment of the wooden brazier M49:2 (labeled as 10I); (b) SIM chromatogram of the internal charred fragment of the wooden brazier M49:2, showing cannabidiol (CBN); (c) TIC chromatogram of the external fragment of the wooden brazier M49:2 (labeled as 10E); (d) SIM chromatogram of the external fragment of the wooden brazier M49:2.

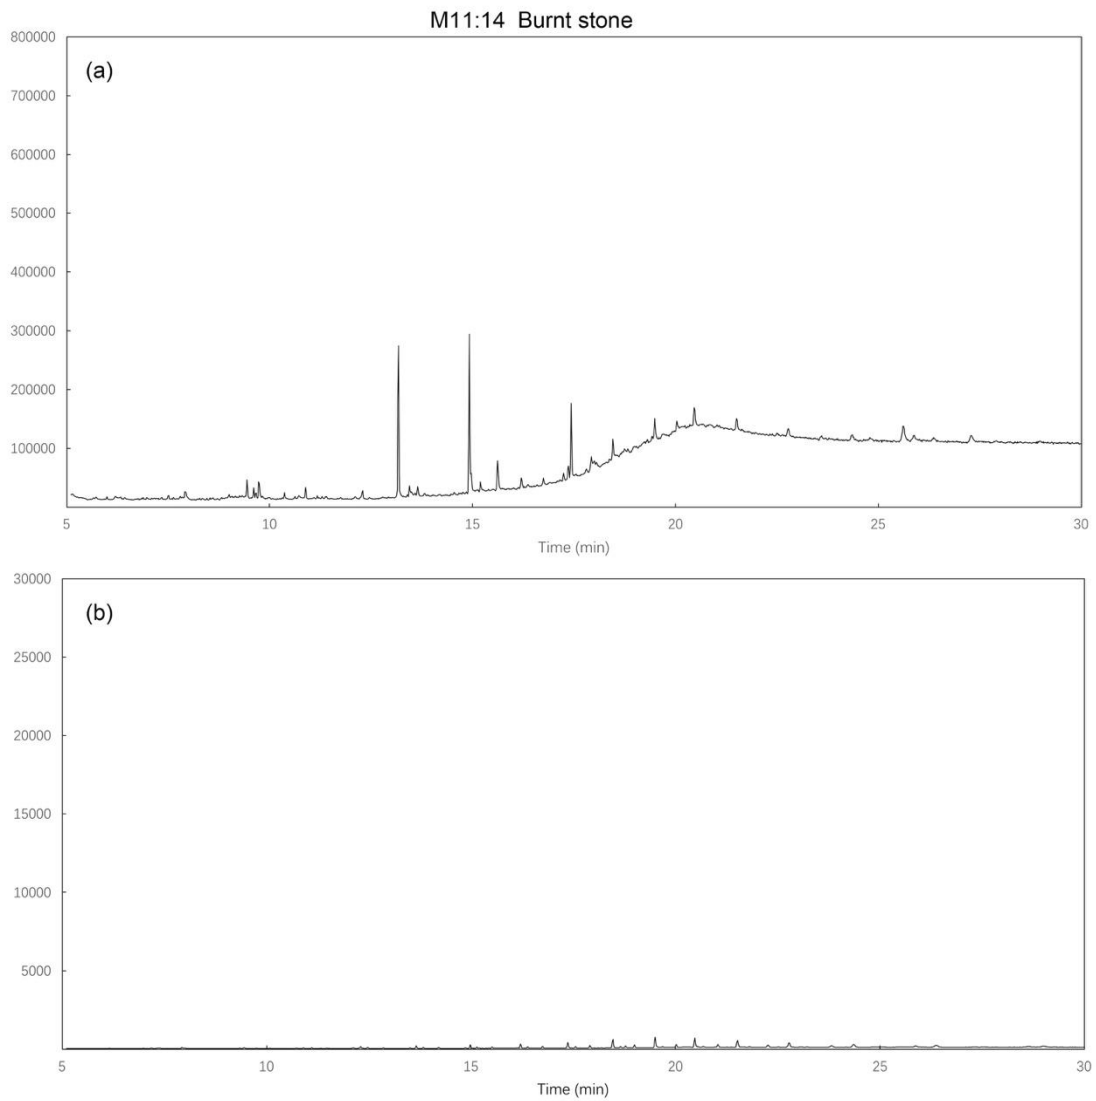

**Fig. S12. Chromatograms of the burnt stone in the wooden brazier M11:14 from the Jirzankal Cemetery.** (a) TIC chromatogram and (b) SIM chromatogram of the burnt stone (labeled as 11S) in the wooden brazier M11:14.

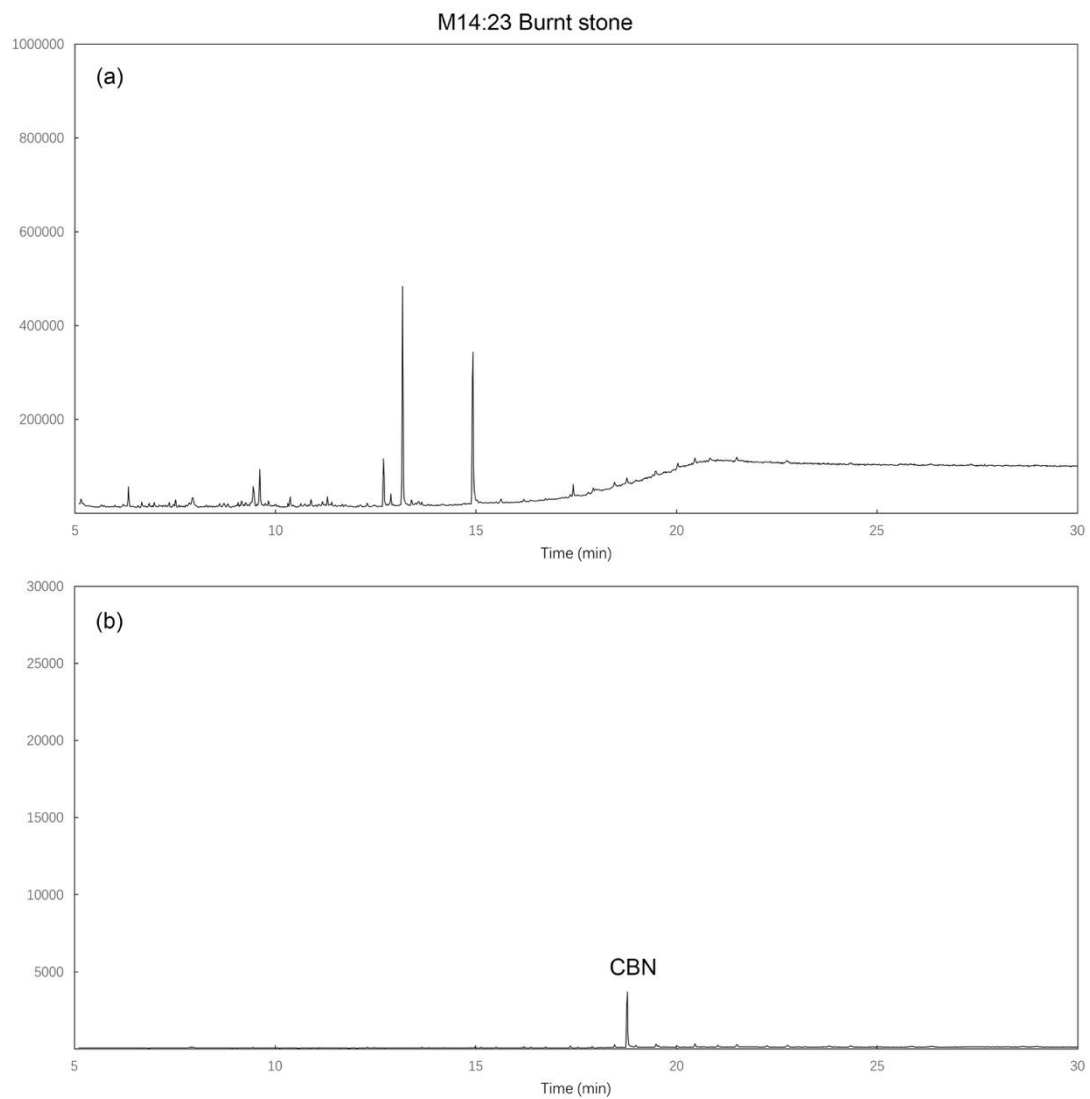

**Fig. S13. Chromatograms of the burnt stone in the wooden brazier M14:23 from the Jirzankal Cemetery.** (a) TIC chromatogram and (b) SIM chromatogram of the burnt stone (labeled as 12S) in the wooden brazier M14:23.

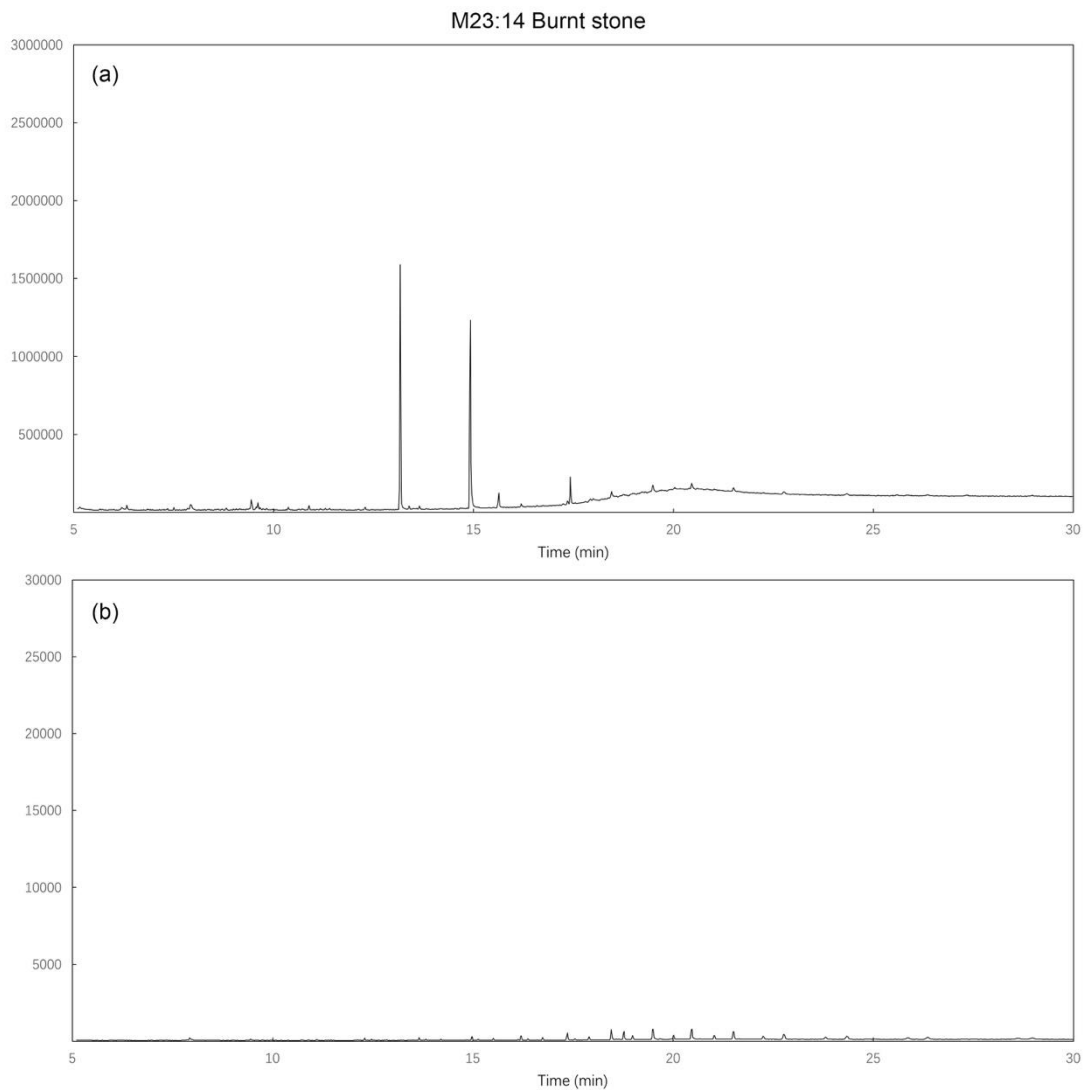

**Fig. S14. Chromatograms of the burnt stone in the wooden brazier M23:14 from the Jirzankal Cemetery.** (a) TIC chromatogram and (b) SIM chromatogram of the burnt stone (labeled as 13S) in the wooden brazier M23:14.



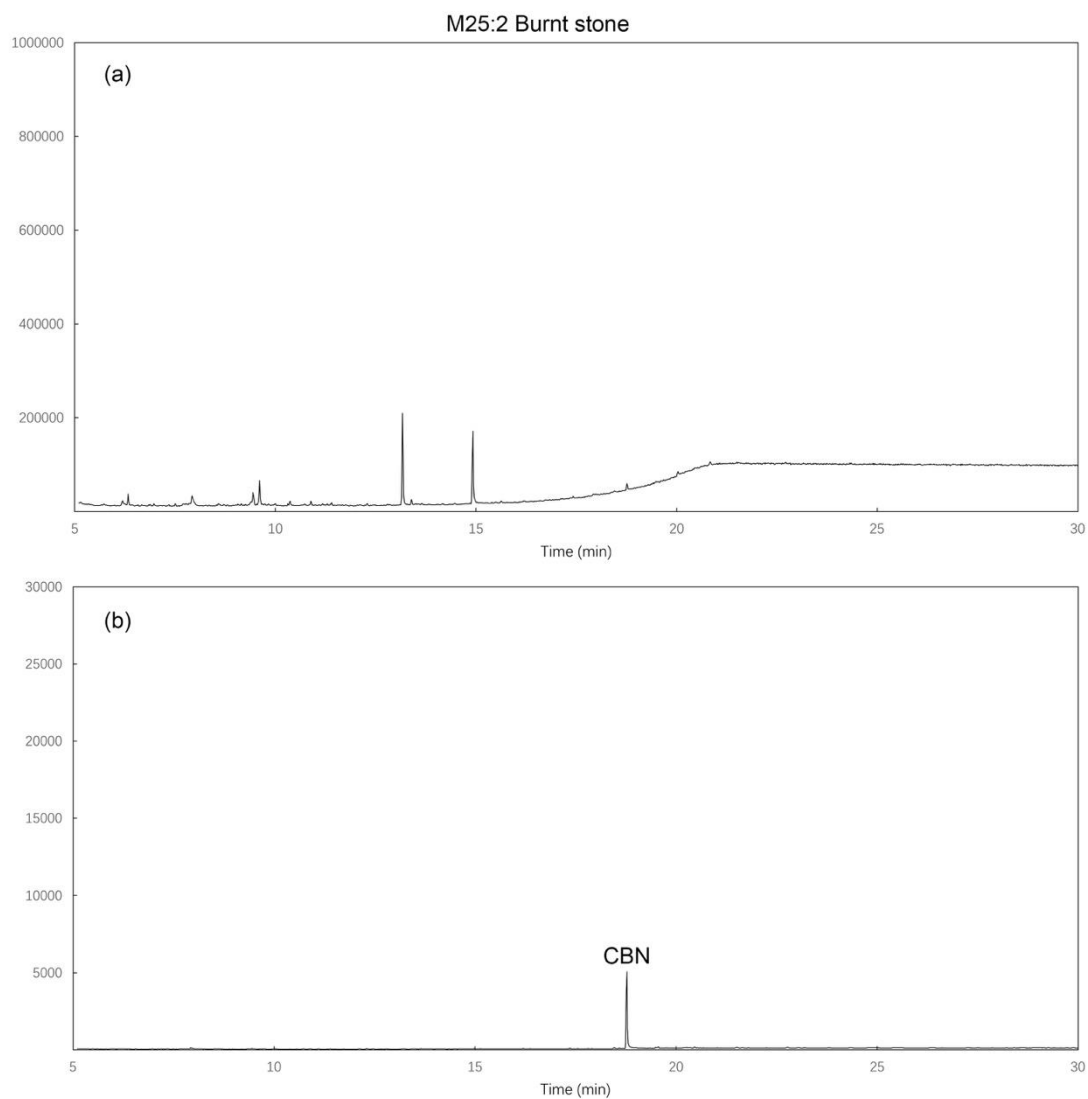

**Fig. S15. Chromatograms of the burnt stone in the wooden brazier M25:2 from the Jirzankal Cemetery.** (a) TIC chromatogram and (b) SIM chromatogram of the burnt stone (labeled as 14S) in the wooden brazier M25:2.
